# Supplementary material
Source: ML conference proceedings conference paper supplement (https://openreview.net/forum?id=FrQd4NoQ16)
Supplement: supplementary_material [file CReFT_CAD_supp.pdf › CReFT_CAD_supp.pdf]

---

# CReFT-CAD: Boosting Orthographic Projection Reasoning for CAD via Reinforcement Fine-Tuning

---

Anonymous Author(s)

Affiliation

Address

email

## 1 A The complete reasoning guidance for each input format

### 2 For the Test Image-Only format:

- 3 • Identify all annotated numbers in the orthographic projection, including dimensions, spacing,  
4 and height.
- 5 • Interpret their meanings based on position, orientation, and surrounding context.
- 6 • Directly assign values to some parameters, count graphical elements for quantity parameters,  
7 and compute spacing parameters based on position.

### 8 For the +Reference Image format:

- 9 • Use the reference template to understand the correspondence between primitive and parame-  
10 ters, and identify annotated numbers in the target image.
- 11 • Assign parameters based on position and template primitive, counting graphical primitive  
12 for quantities.
- 13 • Calculate parameters based on positional relationships or template definitions, and output  
14 the full set of parameter values.

### 15 For the +Answered Image format:

- 16 • Learn the correspondence between structures and parameters from the example image.
- 17 • Identify and interpret annotated numbers in the target image, considering their position and  
18 similarity to the example.
- 19 • Assign values to parameters, count graphical primitive for quantities, calculate parameters,  
20 and apply necessary constraints to produce final results.

### 21 For the +Attribute Explanation format:

- 22 • Clarify parameter definitions and their geometric meanings, including component types and  
23 their properties.
- 24 • Identify annotated numbers in the orthographic projection and infer their corresponding  
25 parameters.
- 26 • Assign values to parameters, compute quantities, derive spacing values from positional  
27 relationships, and output the complete parameter set with necessary constraints.

Table 1: Performance comparison of various VLMs on orthographic projection reasoning tasks.

| PROMPTS         | Without Reasoning Guidance |                   |                   |                           | Reasoning Guidance |                   |                   |                           |
|-----------------|----------------------------|-------------------|-------------------|---------------------------|--------------------|-------------------|-------------------|---------------------------|
|                 | Test Img                   | +Reference<br>Img | +Answered<br>Pair | +Attribute<br>Explanation | Test Img           | +Reference<br>Img | +Answered<br>Pair | +Attribute<br>Explanation |
| Phi-3.5-Vision  | 4.22                       | 8.95              | 8.05              | 6.26                      | 11.32              | 14.40             | 16.16             | 15.79                     |
| LLaVA-OneVision | 9.16                       | 16.06             | 15.65             | 14.84                     | 9.10               | 16.81             | 16.21             | 20.53                     |
| DeepSeek-VL     | 8.16                       | 22.68             | 20.03             | 12.65                     | 14.02              | 20.31             | 24.62             | 25.45                     |
| InternVL2.5     | 15.79                      | 18.82             | 23.30             | 17.16                     | 15.63              | 22.35             | 24.47             | 23.73                     |
| InternVL3       | 15.46                      | 17.90             | 22.44             | 17.91                     | 15.81              | 21.98             | 23.58             | 17.05                     |
| Qwen2.5-Omni    | 23.43                      | 28.89             | 28.74             | 26.50                     | 26.12              | 30.93             | 29.40             | 35.71                     |
| Qwen2.5-VL      | 24.54                      | 30.76             | 30.47             | 25.86                     | 24.54              | 32.78             | 33.64             | 38.88                     |
| Ours            | <b>80.86</b>               | <b>82.99</b>      | <b>83.24</b>      | <b>82.67</b>              | <b>81.35</b>       | <b>83.11</b>      | <b>82.87</b>      | <b>84.03</b>              |

Table 2: Performance comparison of training-free model, SFT model, and our GRPO-based model on orthographic projection reasoning tasks.

| PROMPTS         | Without Reasoning Guidance |                   |                   |                           | Reasoning Guidance |                   |                   |                           |
|-----------------|----------------------------|-------------------|-------------------|---------------------------|--------------------|-------------------|-------------------|---------------------------|
|                 | Test Img                   | +Reference<br>Img | +Answered<br>Pair | +Attribute<br>Explanation | Test Img           | +Reference<br>Img | +Answered<br>Pair | +Attribute<br>Explanation |
| Qwen2.5-VL      | 24.54                      | 30.76             | 30.47             | 25.86                     | 24.54              | 32.78             | 33.64             | 38.88                     |
| Qwen2.5-VL(SFT) | 76.33                      | 79.50             | 77.12             | 78.64                     | 76.42              | 76.78             | 77.20             | 80.30                     |
| Ours            | <b>80.86</b>               | <b>82.99</b>      | <b>83.24</b>      | <b>82.67</b>              | <b>81.35</b>       | <b>83.11</b>      | <b>82.87</b>      | <b>84.03</b>              |

## 28 B Further analysis regarding the three findings

29 **1) Remains a Tough Challenge for pretrained VLMs.** Tab. 1 reports performance across four  
30 prompt formats without and with reasoning guidance. Overall, orthographic projection reasoning  
31 entails not only reading textual dimensions and visual features, but also matching annotations to ge-  
32 ometry primitives, counting structural elements, and computing composite parameters. Consequently,  
33 none of the off-the-shelf models fully masters this composite task. Qwen2.5-VL Wang et al. [2024]  
34 achieves the highest accuracy—38.88% under reasoning guidance with the Test Image + Attribute  
35 Explanation prompt. This improvement stems primarily from its superior ability to parse geometry  
36 layers and read dimension labels. Crucially, its performance on reasoning-intensive parameters  
37 remains low. These findings underscore that orthographic projection CAD cannot be solved by  
38 prompting alone and requires dedicated fine-tuning strategy.

39 **2) Prompt Format–Dependent Performance Gains.** Appending an Attribute Explanation to the  
40 Test Image consistently boosts accuracy compared to the image-only baseline, with an average  
41 increase of 3 to 4 percentage points across models. This demonstrates that strong text encoders  
42 can leverage detailed, engineer-authored descriptions to guide complex geometric and numerical  
43 inferences. Similarly, providing a Reference Image or an Answered Pair results in comparable  
44 improvements, with a 4 to 5 percentage point increase in accuracy. These exemplars offer explicit  
45 visual-textual templates, simplifying the task of matching primitives to their corresponding semantic  
46 labels and dimensions. In contrast, using raw images forces models to address both perception and  
47 reasoning simultaneously, leading to the lowest performance. Collectively, these findings indicate that  
48 multimodal exemplars can enhance existing VLMs’ ability to reason over orthographic projection.  
49 However, this further underscores that additional fine-tuning strategies are crucial to fully bridging  
50 the remaining performance gap.

51 **3)Introducing reasoning guidance yields consistent gains across all seven VLMs.** Introducing  
52 reasoning guidance demonstrates that step-wise reasoning guidance helps models better decompose  
53 the multi-step orthographic projection tasks. In the absence of reasoning guidance, visual exemplar  
54 prompts (+Reference Image and +Answered Pair) deliver the largest relative improvements. However,  
55 when reasoning guidance is added, the Attribute Explanation prompt shows the greatest uplift. It  
56 stems from reasoning guidance is textual form, which synergizes most effectively with textual inputs.  
57 Hence, models with stronger text encoders (e.g., DeepSeek-V1) exhibit disproportionately larger  
58 boosts. These results underscore the necessity of integrating structured reasoning guidance to advance  
59 orthographic projection CAD reasoning.

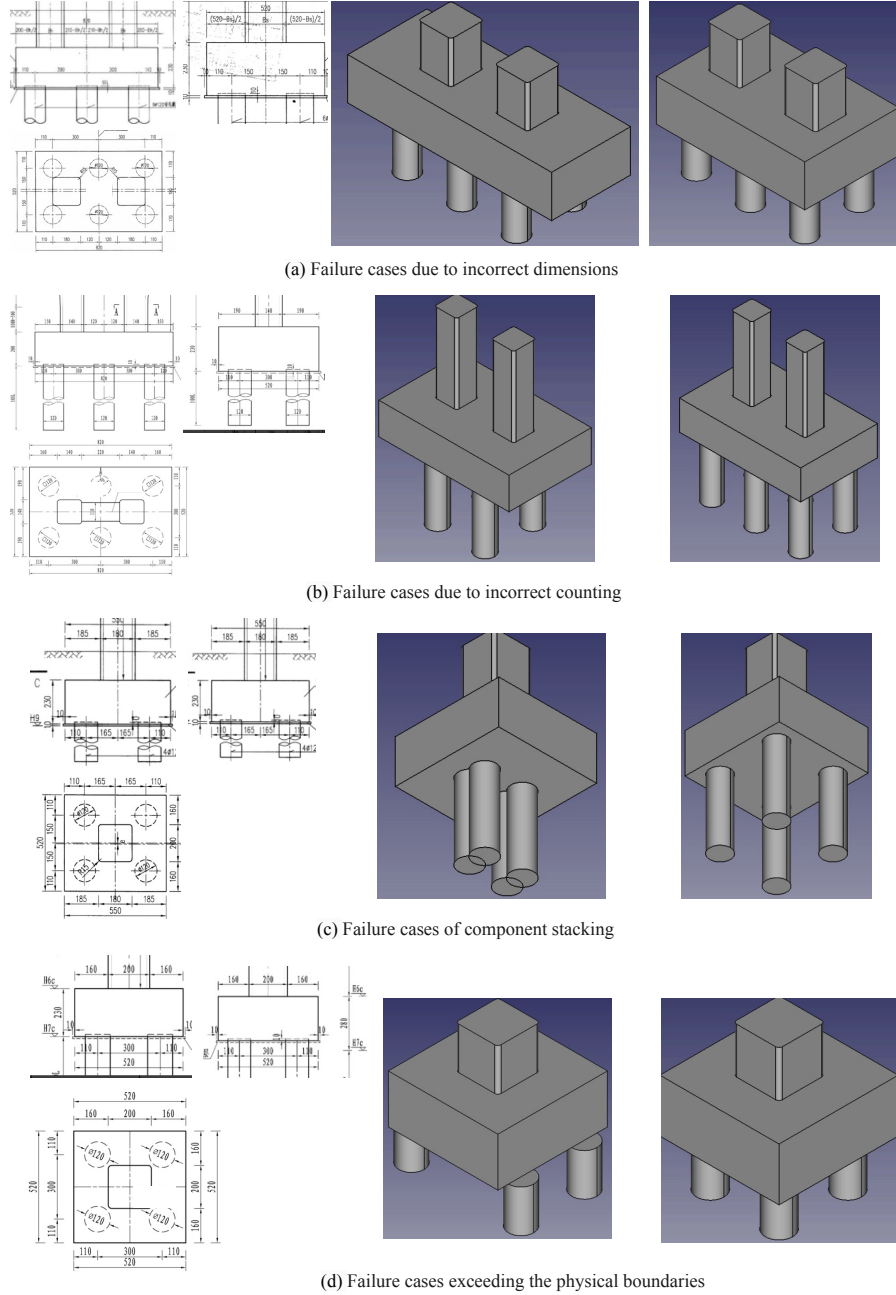

Figure 1: Four sets of failure cases. Each set consists of three parts: the left part shows the orthographic projection, the middle part presents the failed 3D model construction, and the right part illustrates the correctly constructed 3D model.

## 60 C More performance on in-domain testing set

61 Tab. 2 presents the performance in-domain testing set. The first row (Qwen2.5-VL) represents a  
 62 training-free baseline, which exhibits consistently poor performance across all settings, indicating  
 63 the inherent difficulty of this reasoning task without any fine-tuning or adaptation. The second  
 64 row (Qwen2.5-VL with SFT) demonstrates a significant performance improvement, particularly  
 65 when provided with reference images, answered pairs, and attribute explanations. However, despite

these gains, the model still suffers from notable drops in more complex reasoning tasks, especially those involving composite parameter computation. In contrast, our method consistently outperforms both baselines across all settings, achieving the highest accuracy in all prompt configurations, with particularly strong results under reasoning guidance. These results validate the effectiveness of our approach in handling complex geometric reasoning and highlight its robustness across both simple and compositional inference scenarios.

## D Failure cases and analysis

As illustrated in Fig. 1, we present four distinct failure cases, each highlighting different types of errors that can occur during the 3D model reconstruction process due to incorrect 2D parameterization. Fig. 1(a) demonstrates the error induced by incorrect dimensional parameters. Specifically, due to errors in the parameterization of certain dimensions, the constructed 3D model exhibits significant scaling issues, leading to a distorted and non-accurate representation. This failure emphasizes the critical importance of precise dimensional input when translating from 2D projections to 3D models, as even minor errors in size parameters can drastically affect the final output. Fig. 1(b) illustrates a failure caused by incorrect counting, which results in an incorrect number of primitives being identified and subsequently integrated into the 3D model. The discrepancy in the number of primitives reflects the direct impact that improper counting and recognition of geometric elements can have on the success of the 3D reconstruction. In Fig. 1(c), we observe a stacking issue caused by errors in the calculation of composite parameters. The failure manifests as improper alignment of components in the final model, where parts of the 3D structure fail to align correctly with each other. Lastly, Fig. 1(d) shows a failure resulting from exceeding physical boundaries due to incorrect composite parameter calculations. In this case, the incorrect parameters lead to elements of the 3D model extending beyond the physical constraints or limits of the original design. Together, these four failure cases provide strong evidence that errors in the parameterization of 2D models directly lead to inaccuracies in 3D model reconstruction. Each case illustrates the cascading effect of parameter errors from the 2D representation to the final 3D model, further underscoring the necessity for robust and precise parameterization methods in 2D-to-3D model conversion processes.

## References

- Peng Wang, Shuai Bai, Sinan Tan, Shijie Wang, Zhihao Fan, Jinze Bai, Keqin Chen, Xuejing Liu, Jialin Wang, Wenbin Ge, et al. Qwen2-vl: Enhancing vision-language model’s perception of the world at any resolution. *arXiv preprint arXiv:2409.12191*, 2024.
